# Supplementary material
Source: Springer Nature journal article supplement (https://www.springermedizin.de/resource/supplementary/12933_2011_385_MOESM1_ESM.pdf/9538308)

A

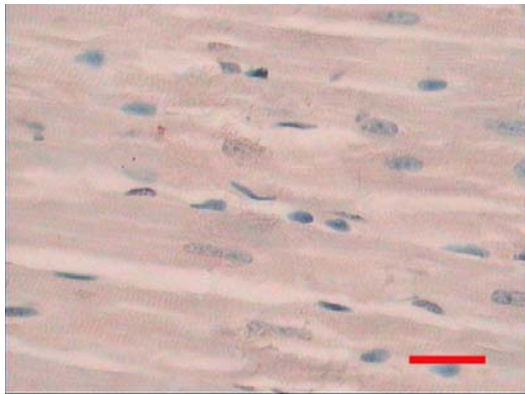

CONT

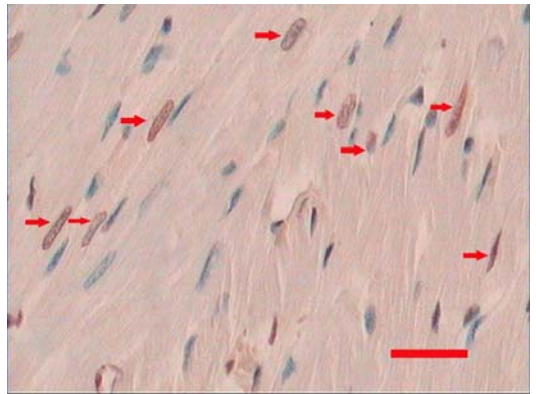

DCM

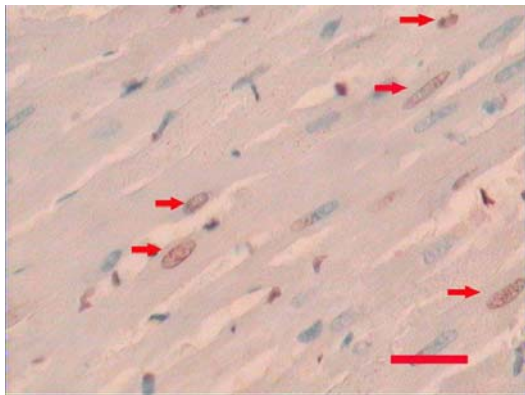

NRG-1

B

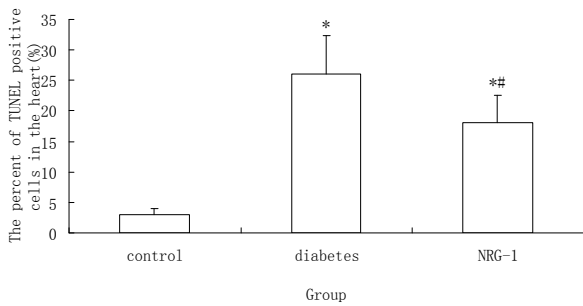

Supplement: MOESM1 [file 9538308]
